# Supplementary material
Source: PubMed Central journal article supplement (PMC5660500)
Supplement: JVI.01371-17_zjv999183074s1.pdf [file JVI.01371-17_zjv999183074s1.pdf]

**Supplemental Movie 1. Viral factory dynamics in infected cells.** BHK-T7 cells were infected with rTC- $\mu$ NS(C-term-T1L)/P2, and at 18 h p.i. FIAsh-EDT2 was added to the cells to label TC- $\mu$ NS labeled VFs. After 45 mins incubation, images were acquired at 20 second intervals for 2 h. Images were processed using ImageJ software. Red arrow points to the two fusion events and the yellow arrow points to the kissing motion of VFs shown in Figure 7.

**Supplemental Movie 2. Viral factory dynamics in infected cells without nocodazole treatment.** Vero cells were infected with rTC- $\mu$ NS(C-term-T1L)/P5, and at 10 h p.i. FIAsh-EDT2 was added to the cells to label TC- $\mu$ NS labeled VFs. After 2 h incubation, FIAsh-EDT2 was removed and images were acquired at 2 min intervals for 2 h. Images were processed using ImageJ software. Red and blue arrows points to the two fusion events shown in Figure 8 and the green arrow shows disruption of two VFs in close proximity by movement of other VFs.

**Supplemental Movie 3. Viral factory dynamics in infected cells with nocodazole treatment.** Vero cells were infected with rTC- $\mu$ NS(C-term-T1L)/P5, treated with 10  $\mu$ M nocodazole at 6 h p.i., and at 10 h p.i. FIAsh-EDT2 was added to the cells to label TC- $\mu$ NS labeled VFs. After 2 h incubation, FIAsh-EDT2 was removed and images were acquired at 2 min intervals for 2 h. Images were processed using ImageJ software. The yellow arrow points to a VF cluster that cannot fuse, and the green arrow indicates VF movement shown in Figure 8.
